# Supplementary material for: Engineering CAR-NK cells to secrete IL-15 sustains their anti-AML functionality but is associated with systemic toxicities
Source: PubMed Central journal article supplement — J Immunother Cancer. 2021 Dec 7;9(12):e003894. doi: 10.1136/jitc-2021-003894 (PMC8655609; doi:10.1136/jitc-2021-003894), 2021-12-07
Supplement: jitc-2021-003894supp002.pdf [file jitc-2021-003894supp002.pdf]

**Supplemental Table 1.** Detailed list of the fluorophore-conjugated antibodies used in flow cytometry experiments.

| Marker                     | Fluorophore      | Clone     | Company     |
|----------------------------|------------------|-----------|-------------|
| CD56                       | BV421            | HCD56     | BioLegend   |
| CD56                       | APC              | HCD56     | BioLegend   |
| CD56                       | BUV805           | NCAM16.2  | BD          |
| CD16                       | BUV563           | 3G8       | BD          |
| CD33                       | PerCP/Cyanine5.5 | P67.6     | BioLegend   |
| CD33                       | BV785            | WM53      | BioLegend   |
| His-tag                    | APC              | J095G46   | BioLegend   |
| His-tag                    | PE               | J095G46   | BioLegend   |
| CD158b (KIR2DL2/2DL3/2DS2) | BUV661           | CH-L      | BD          |
| CD158e1 (KIR3DL1)          | BV480            | DX9       | BD          |
| CD158 (KIR2DL1/S1/S3/S5)   | APC/Fire™ 750    | HP-MA4    | BioLegend   |
| NKG2A (CD159a)             | UV737            | 131411    | BD          |
| NKp30 (CD337, NCR3)        | BB700            | p30-15    | BD          |
| NKp46 (CD335, NCR1)        | BB515            | 9E2/NKp46 | BD          |
| CD57                       | BV605            | QA17A04   | BioLegend   |
| CD62L                      | Red 718          | SK11      | BD          |
| PVRIG                      | Alexa Fluor 405  | 2334A     | R&D Systems |
| TIGIT                      | BUV395           | 741182    | BD          |
| CD96                       | BV711            | 6F9       | BD          |
| NKG2D (CD314)              | PE-Cy7           | 1D11      | BioLegend   |
| DNAM-1 (CD226)             | PE/Dazzle™ 594   | 11A8      | BioLegend   |
| TRAIL (CD253)              | BV711            | RIK-2     | BD          |
| FAS-L (CD178)              | BV421            | NOK-1     | BioLegend   |
| TIM-3 (HAVCR2)             | BB700            | 7D3       | BD          |
| LAG3 (CD223)               | BV650            | 11C3C65   | BioLegend   |
| PD-1 (CD279)               | BB515            | EH12.1    | BD          |

|                    |                  |           |             |
|--------------------|------------------|-----------|-------------|
| NKG2C (CD159c)     | BV605            | 134591    | BD          |
| 2B4 (CD244)        | PE-CF594         | 2-69      | BD          |
| KLRG1 (MAFA)       | PE-Cy7           | 2F1/KLRG1 | BioLegend   |
| CD69               | BUV805           | FN50      | BD          |
| LFA-1 (CD11a)      | Red 718          | G-25.2    | BD          |
| CD161              | BUV395           | HP-3G10   | BD          |
| TRAIL-R1 (CD261)   | BV421            | S35-934   | BD          |
| FAS (CD95)         | BB515            | DX2       | BD          |
| MICA/MICB (PERB11) | PE-Cy7           | 6D4       | BioLegend   |
| ULBP-1             | APC              | 170818    | R&D Systems |
| CD48               | PE-CF594         | TÜ145     | BD          |
| CD112 (Nectin-2)   | PerCP/Cyanine5.5 | TX31      | BioLegend   |
| CD155 (PVR)        | V711             | TX24      | BD          |
| galectin-9         | PE               | 9M1-3     | BD          |
| PD-L1 (CD274)      | UV395            | MIH1      | BD          |
| CD19               | PerCP/Cyanine5.5 | SJ25C1    | BioLegend   |

**Supplemental Table 2.** Genes included in the clusters 1-4 shown in Fig. 5D (listed from top to bottom of the cluster).

| Cluster 1    | Cluster 2 | Cluster 3 | Cluster 4  |
|--------------|-----------|-----------|------------|
| RAD54B       | CD9       | DTL       | CTNNA1     |
| MSH5         | APOD      | CHEK2     | ANKRD35    |
| EHHADH       | SMOX      | CDC45     | EFCAB11    |
| SIGLEC7      | GPA33     | TROAP     | RCCD1      |
| HCG27        | EGR2      | CDKN2C    | CDKN2B-AS1 |
| B4GALT6      | PAQR4     | CCNE1     | FAM72B     |
| ZNF90        | E2F1      | PHF19     | C4orf33    |
| SAPCD1       | ORC1      | MAD2L1    | ANXA4      |
| BLVRA        | CDT1      | WDR76     | CD86       |
| MCOLN2       | TONSL     | IKZF4     | SIM1       |
| NEDD4        | HIST1H3G  | LRP8      | TMPO       |
| ACYP1        | POLD1     | LIN9      | FAM72D     |
| ACOT9        | HIST1H1B  | PTTG1     | FBXO43     |
| SORT1        | HIST1H2BM | KIF23     | CMPK2      |
| CDC42BPA     | HAUS8     | CCDC150   | FN1        |
| KIF18A       | HIST1H2AL | EPB41L2   | CRTAM      |
| SAPCD1       | CENPM     | HIST1H1D  | KIAA1524   |
| STAP1        | NHS       | ENTPD1    | KPNA2      |
| ANO6         | CD84      | PHTF2     | SGOL2      |
| DBF4         | CCNF      | RSAD2     | CCDC18     |
| LOC100507002 | TP73      | GEM       | ERI2       |
| CENPK        | TNC       | CASC5     | BRCA2      |
| KDELC2       | TIAM1     | NUF2      | CDH17      |
| GBP4         | PTPRG     | UBE2T     | MELK       |
| GGCT         | GOLGA8G   | FANCI     | CDC7       |
| SIRPG        | ADGRL2    | RAD51AP1  | RRM2       |
| BARD1        | ZFH3      | NUSAP1    | HJURP      |
| GZMA         | WNT7B     | POLQ      | DIAPH3     |
| DGKA         | DRAXIN    | NCAPH     | SHCBP1     |
| FBXO44       | GOLGA8DP  | CLSPN     | KNTC1      |
| CENPQ        | BCL2L11   | UBE2C     | E2F8       |
| ARL6IP6      | GOLGA8F   | STMN1     | KIF20A     |
| NEIL3        | FRMD5     | FOXM1     | DEPDC1B    |
| ELOVL6       | ACVR1B    | SKA1      | TMPO       |
| CENPE        | CHRM3-AS2 | TYMS      | TACC3      |
| CCNE2        | ADAM19    | C2orf48   | DDIAS      |
| DPP4         | NCR2      | CDC25C    | KIF15      |
| HTATSF1      | VWA2      | SPC25     | TTK        |

|              |           |              |        |
|--------------|-----------|--------------|--------|
| FBXO5        | DYSF      | GIN52        | E2F7   |
| YEATS4       | RGS16     | LOC81691     | CEP55  |
| SMC4         | FAM221A   | MAL          | NEK2   |
| STARD4       | CCL3L3    | EME1         | ACAT2  |
| CCNG1        | MIR210HG  | BRCA1        | OAS3   |
| KIR2DL4      | CCL4      | XRCC2        | INCENP |
| TNS4         | CCL3      | SGOL1        |        |
| MYBL1        | HIST2H2AB | CCDC34       |        |
| GPR171       | HAPLN3    | PTGIS        |        |
| KIF20B       | TNFSF12   | PTPN3        |        |
| SYCP2        | OMD       | ASF1B        |        |
| DCK          | PSMC3IP   | PKMYT1       |        |
| NTRK2        | HACD1     | MYBL2        |        |
| DMRT2        | SDC4      | E2F2         |        |
| NEDD9        | DTYMK     | RAD54L       |        |
| CEP152       | LRRC20    | EDA2R        |        |
| ARHGAP11A    | SMCO4     | LOC100506985 |        |
| PDGFRB       | PRADC1    | RCAN3        |        |
| SOCS2        | LTA       | HIST1H3B     |        |
| ARNTL2       | FAAP24    | MCM4         |        |
| ERI1         | FANCC     | SPAG5        |        |
| IFI44        | CENPH     | GIN53        |        |
| EZH2         | C17orf53  | ORC6         |        |
| GBP1         | TK1       | SAPCD2       |        |
| OPHN1        | LOC642846 | CKS1B        |        |
| LOC100288637 | UNQ6494   | TUBA1B       |        |
| FBXO2        | TNFRSF8   | TUBB         |        |
| AFAP1L2      | C16orf59  | HIST1H2BH    |        |
| LTB          | TRAIP     | RMI2         |        |
| PIF1         | FBXO6     | CCNB1        |        |
| LAIR2        | FANCG     | EXO1         |        |
| EPDR1        | DMD       | CDC6         |        |
| HOXB6        | IFI27L1   | BUB1B        |        |
| CD80         | AURKB     | CENPI        |        |
| NUGGC        | STXBP5L   | GTSE1        |        |
| RNASE4       | DMC1      | TICRR        |        |
| CHEK1        | OIP5      | IQGAP3       |        |
| CDKN3        | MCOLN3    | DLGAP5       |        |
| CREM         | APOBEC3B  | CIT          |        |
| KIF11        | KIF4A     | AURKA        |        |
| PLK4         | KIF24     | BCL2         |        |

|              |          |          |  |
|--------------|----------|----------|--|
| RBBP8        | TMEM106C | ASPM     |  |
| HMGB2        | NRM      | STIL     |  |
| DNAJC9       | CENPN    | PRIM1    |  |
| FAM72C       | CENPP    | CDK1     |  |
| PRTFDC1      | CDK2     | TPX2     |  |
| LEF1         | UBASH3B  | ANLN     |  |
| TNFSF8       |          | PRR11    |  |
| FAS          |          | CDCA2    |  |
| ATAD2        |          | PRC1     |  |
| CENPU        |          | MKI67    |  |
| RRM1         |          | ESCO2    |  |
| TCF19        |          | TOP2A    |  |
| BRIP1        |          | KIF14    |  |
| DEPDC1       |          | HMMR     |  |
| CKAP2L       |          | CCNB2    |  |
| NCAPG        |          | CDCA3    |  |
| ECT2         |          | CDCA8    |  |
| NDC80        |          | KIF18B   |  |
| ZNF367       |          | MCM10    |  |
| RGS6         |          | CDC20    |  |
| TJP1         |          | KIFC1    |  |
| ITGA2        |          | TIMELESS |  |
| CEACAM1      |          | KIF2C    |  |
| HOXB7        |          | KIAA0101 |  |
| MB21D2       |          | ZWINT    |  |
| SLAMF1       |          | WDR62    |  |
| LOC100294145 |          | CDCA5    |  |
| FANCD2       |          | PLK1     |  |
| RNF157       |          | RAD51    |  |
| C1orf112     |          | CDC25A   |  |
| MASTL        |          | DSN1     |  |
| MBOAT2       |          | SUV39H1  |  |
| POLE2        |          | POC1A    |  |
| C18orf54     |          | CBR3     |  |
| LOC399815    |          | FDXR     |  |
| ZNF730       |          | LIG1     |  |
| TEX30        |          | BIRC5    |  |
| USP18        |          | ESPL1    |  |
| HMSD         |          | UHRF1    |  |
| LINC00892    |          | CENPW    |  |
| SERPINE2     |          | PCNA     |  |

|           |  |           |  |
|-----------|--|-----------|--|
| ACTA2     |  | CENPA     |  |
| TSPAN5    |  | WDHD1     |  |
| B4GALNT1  |  | TRIP13    |  |
| LINC00504 |  | DHFR      |  |
| NDFIP2    |  | FAM111B   |  |
| NCAM1     |  | SKA3      |  |
|           |  | SMC2      |  |
|           |  | CCNA2     |  |
|           |  | GGH       |  |
|           |  | STX3      |  |
|           |  | RACGAP1   |  |
|           |  | DSCC1     |  |
|           |  | RBL1      |  |
|           |  | ANXA9     |  |
|           |  | APOL4     |  |
|           |  | C21orf58  |  |
|           |  | GIN54     |  |
|           |  | MCM2      |  |
|           |  | HIRIP3    |  |
|           |  | MCM3      |  |
|           |  | MTFR2     |  |
|           |  | GIN51     |  |
|           |  | NCAPG2    |  |
|           |  | CHAF1B    |  |
|           |  | RPL39L    |  |
|           |  | NPC2      |  |
|           |  | IFNLR1    |  |
|           |  | OAS1      |  |
|           |  | CKS2      |  |
|           |  | GMNN      |  |
|           |  | KDEL1C    |  |
|           |  | ARHGAP11B |  |
