# Supplementary material for: Engineering CAR-NK cells to secrete IL-15 sustains their anti-AML functionality but is associated with systemic toxicities
Source: PubMed Central journal article supplement — J Immunother Cancer. 2021 Dec 7;9(12):e003894. doi: 10.1136/jitc-2021-003894 (PMC8655609; doi:10.1136/jitc-2021-003894), 2021-12-07
Supplement: jitc-2021-003894supp004.pdf [file jitc-2021-003894supp004.pdf]

## Engineering CAR-NK cells to secrete IL15 sustains their anti-AML functionality, but is associated with systemic toxicities

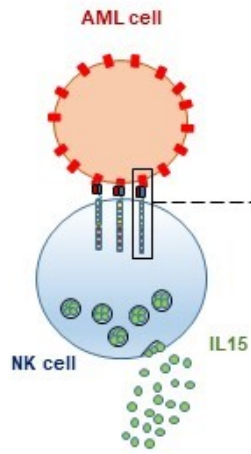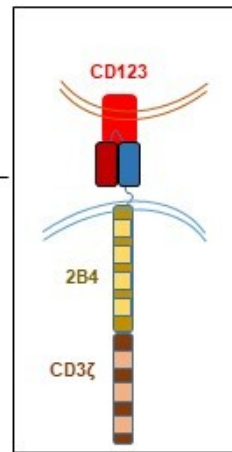

### Authors

Ilias Christodoulou, Won Jin Ho, Andrew Marple, Jonas W. Ravich, Ada Tam, Ruyan Rahnama, Adam Fearnow, Cambrynne Rietberg, Sean Yanik, Elena E. Solomou, Ravi Varadhan, Michael A. Koldobskiy, Chalice L. Bonifant

### Correspondence

cbonifa2@jh.edu

### In Brief

Secretion of IL15 from anti-CD123.2B4.CD3 $\zeta$  CAR-NK cells enhances their activation and killing potential against Acute Myelogenous Leukemia, but carries the risk of severe systemic toxicity.

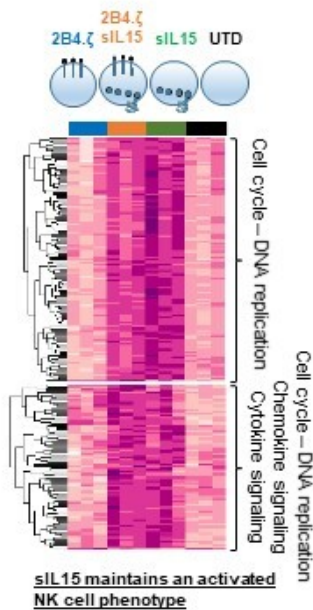

Anti-CD123.2B4.CD3 $\zeta$  CAR

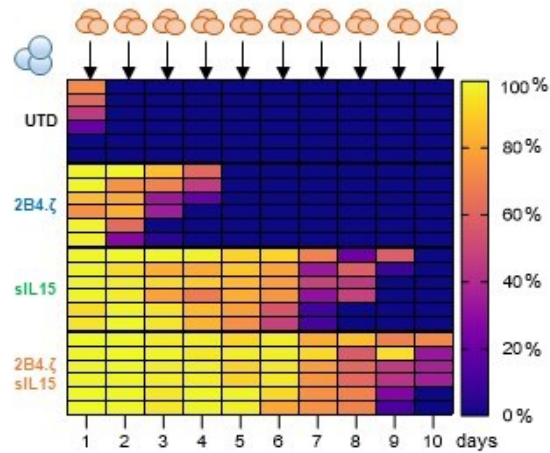

CAR-NK cells secreting IL15 demonstrate sustained and powerful anti-AML cytotoxicity
